# Supplementary material for: Knowledge graph-based recommendation framework identifies drivers of resistance in EGFR mutant non-small cell lung cancer
Source: PubMed Central journal article supplement (PMC8964738; doi:10.1038/s41467-022-29292-7), 2022-03-29

| Category     | Name                                                                                           | Definition                                                                                                                                                                                                                                                                                                                                                                                                                                                                                                                                                                                                   | Default                                                                             |
|--------------|------------------------------------------------------------------------------------------------|--------------------------------------------------------------------------------------------------------------------------------------------------------------------------------------------------------------------------------------------------------------------------------------------------------------------------------------------------------------------------------------------------------------------------------------------------------------------------------------------------------------------------------------------------------------------------------------------------------------|-------------------------------------------------------------------------------------|
| Essentiality | depmap                                                                                         | Gene essentiality according to DepMap; used for filtering only.                                                                                                                                                                                                                                                                                                                                                                                                                                                                                                                                              | exclude                                                                             |
| Tractability | trct_ab<br>trct_sm<br>trct_om                                                                  | Tractability with antibodies<br>Tractability with small molecules<br>Tractability with other modalities                                                                                                                                                                                                                                                                                                                                                                                                                                                                                                      | exclude<br>maximize<br>exclude                                                      |
| Literature   | lit_nsclc<br><br>lit_egfr<br><br>lit_egfr_norm<br><br>lit_nsclc_norm                           | Number of papers mentioning NSCLC AND a candidate gene in cancer context<br>Number of papers mentioning EGFR AND a candidate gene in cancer context<br>Normalized frequency EGFR + a gene over total number of papers about a gene<br>Normalized frequency NSCLC + a gene over total number of papers about a gene                                                                                                                                                                                                                                                                                           | maximize<br><br>maximize<br><br>exclude<br><br>exclude                              |
| KG-derived   | L2_egfr<br><br>L2_nsclc<br><br>n_neighbours<br>n_edges<br>degree<br>pageRank<br>betweenness    | Euclidean distance from a gene to EGFR node based on RESCAL embeddings<br>Euclidean distance from a gene to NSCLC node based on RESCAL embeddings<br>Number of unique neighbours in the full graph<br>Number of edges connected to a node in KG<br>Node degree in PPI subgraph<br>pageRank for a node computed on PPI subgraph<br>betweenness centrality of a node, computed on PPI subgraph                                                                                                                                                                                                                 | exclude<br><br>exclude<br><br>exclude<br>exclude<br>exclude<br>maximize<br>maximize |
| CRISPR       | full_screen<br><br>KO_osi<br><br>KO_gefi<br><br>KO_all<br><br>A_osi<br><br>A_gefi<br><br>A_all | summary consistency across all cell lines in CRISPRn and CRISPRa screens<br>CRISPRn, number of cell lines treated with osimertinib where a gene is a hit<br>CRISPRn, number of cell lines treated with gefitinib where a gene is a hit<br>CRISPRn, number of cell lines treated with either osimertinib or gefitinib where a gene is a hit<br>CRISPRa, number of cell lines treated with osimertinib where a gene is a hit<br>CRISPRa, number of cell lines treated with gefitinib where a gene is a hit<br>CRISPRa, number of cell lines treated with either osimertinib or gefitinib where a gene is a hit | maximize<br><br>exclude<br><br>exclude<br><br>exclude<br><br>exclude<br><br>exclude |
| Clinical     | clinical_ES1<br><br>clinical_ES2<br><br>clinical_ES3                                           | mutation enrichment score across internal clinical studies AURAext, AURA2, and AURA3<br>mutation enrichment score in internal clinical study FLAURA<br>mutation enrichment score comparing internal studies FLAURA and ORCHARD                                                                                                                                                                                                                                                                                                                                                                               | maximize<br><br>maximize<br><br>maximize                                            |
| Pre-clinical | RNASeq_LFC<br><br>RNASeq_pval                                                                  | log2 fold change from internal RNAseq study, where cancer cell lines were treated with osimertinib vs DMSO treatment<br>adjusted p-values associated with LFC                                                                                                                                                                                                                                                                                                                                                                                                                                                | maximize<br><br>minimize                                                            |

Table 1: SUPPLEMENTARY. Definitions of features used for multi-objective optimization. All default features were assigned optimization direction ('maximize/minimize') in the 'Default' column.

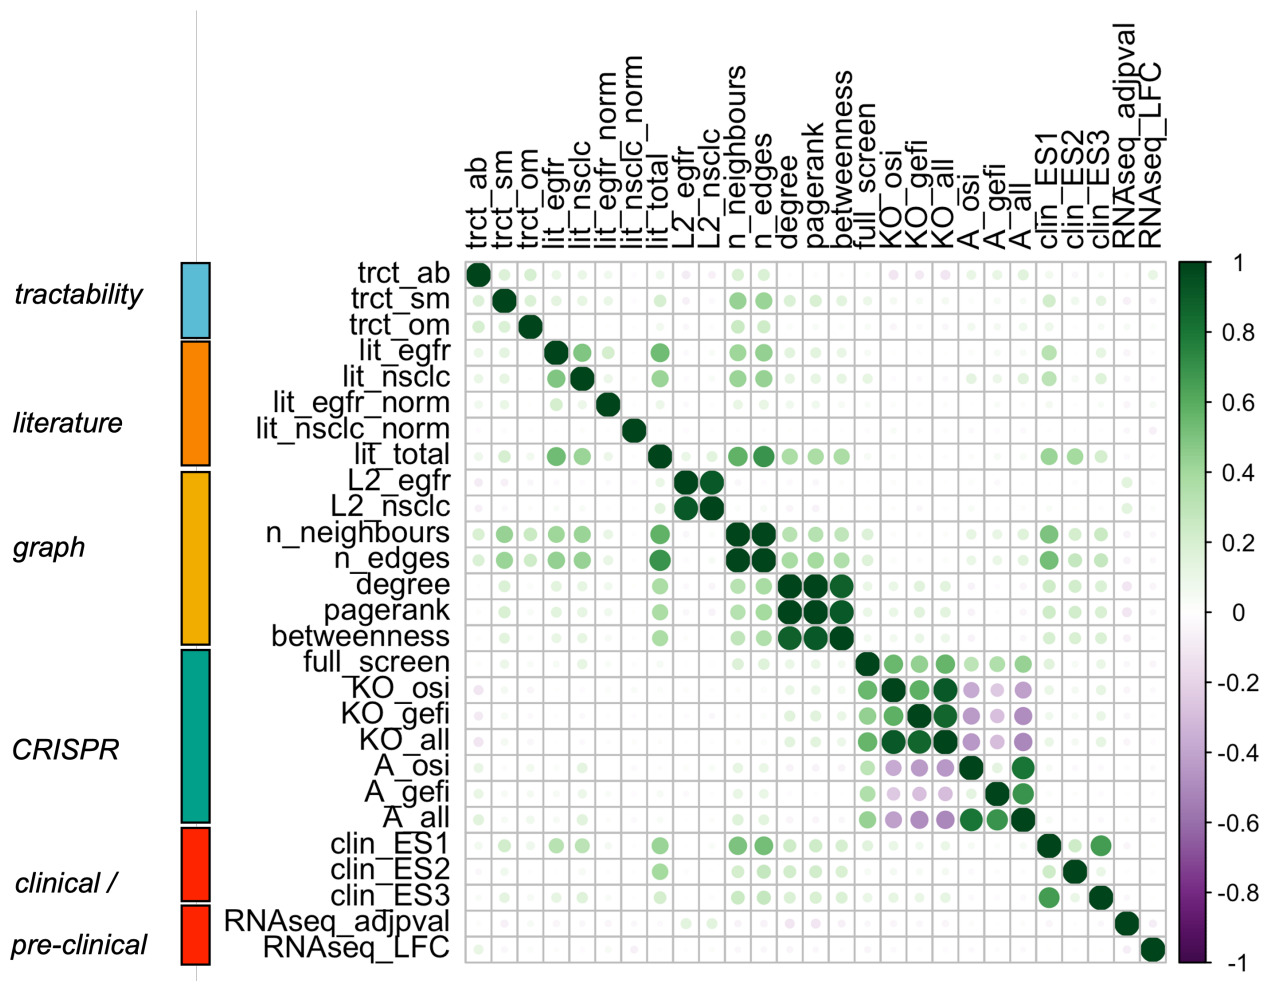

Figure 7: SUPPLEMENTARY. Correlation structure of the hybrid feature space. The analysis indicated two strong underlying patterns: 1) positive correlation within the graph-derived feature group, especially between degree, pageRank and betweenness metrics; 2) summary features derived from the CRISPR screen experiment follow expected pattern with metrics derived from KO and Activation screens demonstrating negative correlation.

| Maps                                                                       | Total | p-value | FDR     | In Data | Network objects from data                                                                                         |
|----------------------------------------------------------------------------|-------|---------|---------|---------|-------------------------------------------------------------------------------------------------------------------|
| EGFR signaling in Prostate Cancer                                          | 46    | 7.8e-16 | 7.9e-13 | 11      | c-Src, PLC-gamma, ERK2 (MAPK1), Tuberin, ERK1 (MAPK3), AKT(PKB), ErbB2, K-RAS, NCOA2 (GRIP1/TIF2), ERK1/2, ErbB3  |
| Development Estrogen-independent activation of ESR1 and ESR2               | 44    | 3.1e-14 | 1.5e-11 | 10      | NCOA1 (SRC1), ERK2 (MAPK1), ERK1 (MAPK3), AKT(PKB), ErbB2, CBP, p300, NCOA2 (GRIP1/TIF2), ERK1/2, ErbB3           |
| Mechanisms of resistance to EGFR inhibitors in lung cancer                 | 45    | 2.2e-12 | 7.5e-10 | 9       | c-Src, ERK2 (MAPK1), ERK1 (MAPK3), AKT(PKB), ErbB2, K-RAS, PTEN, HGF receptor (Met), ErbB3                        |
| NRF2 regulation of oxidative stress response                               | 54    | 1.3e-13 | 2.4e-09 | 9       | ERK2 (MAPK1), BRG1, MafK, ERK1 (MAPK3), AKT(PKB), p53, CBP, KEAP1, PKC                                            |
| Aberrant B-Raf signaling in melanoma progression                           | 55    | 1.5e-11 | 2.4e-09 | 9       | Tuberin, CBP, AKT1, ERK1/2, ROCK, ERK2 (MAPK1), BMF, AKT(PKB), Rictor                                             |
| Development Androgen receptor in reproductive system development           | 80    | 1.7e-11 | 2.4e-09 | 10      | c-Src, NCOA1 (SRC1), AKT(PKB), p53, CBP, EZH2, AKT1, WT1, NCOA2 (GRIP1/TIF2), ERK1/2                              |
| Main pathways of Schwann cells transformation in neurofibromatosis type 1  | 80    | 1.7e-11 | 2.4e-09 | 10      | Neurofibromin, Tuberin, AKT(PKB), Bim, ErbB2, K-RAS, PLC-gamma 1, PTEN, ERK1/2, ErbB3                             |
| Androgen receptor activation and downstream signaling in Prostate cancer   | 110   | 1.9e-11 | 2.4e-09 | 11      | c-Src, NCOA1 (SRC1), ERK2 (MAPK1), PKC-delta, ERK1 (MAPK3), AKT(PKB), ErbB2, K-RAS, p53, PTEN, NCOA2 (GRIP1/TIF2) |
| Regulation of Tissue factor signaling in cancer                            | 43    | 7.5e-11 | 8.4e-09 | 8       | ERK2 (MAPK1), ERK1 (MAPK3), AKT(PKB), K-RAS, VEGFR-2, p53, PTEN, ERK1/2                                           |
| Development Membrane-bound ESR1: interaction with growth factors signaling | 45    | 1.1e-10 | 1.1e-08 | 8       | c-Src, NCOA1 (SRC1), AKT(PKB), ErbB2, CBP, p300, ERK1/2, ErbB3                                                    |

Table 2: SUPPLEMENTARY. Pathway Enrichment Analysis. Enrichment analysis consists of matching gene IDs of possible targets with gene IDs in functional ontologies in MetaCore. The probability of a random intersection between a set of IDs the size of target list with ontology entities is estimated using p-value of hypergeometric intersection. The lower p-value means higher relevance of the entity to the dataset, which shows in higher rating for the entity.

| Gene    | Therapeutic level | Diagnostic level | Prognostic level | Resistance level | FDA level | Oncogenic Alterations (OA) |
|---------|-------------------|------------------|------------------|------------------|-----------|----------------------------|
| AKT1    | 3A                | -                | -                | -                | 3         | -                          |
| CDK4    | 4                 | -                | -                | -                | 3         | -                          |
| CREBBP  | -                 | Dx2              | -                | -                | -         | -                          |
| CSF1R   | -                 | -                | Px1              | -                | -         | -                          |
| ERBB2   | 1                 | -                | -                | -                | 2         | -                          |
| EZH2    | 1                 | Dx2              | Px1              | -                | 2         | -                          |
| FGFR4   | -                 | -                | -                | -                | -         | OA                         |
| KDR     | -                 | -                | -                | -                | -         | OA                         |
| KRAS    | 1                 | Dx2              | -                | R1               | 2         | OA                         |
| LZTR1   | -                 | -                | -                | -                | -         | OA                         |
| MAPK1   | -                 | -                | -                | -                | -         | OA                         |
| MET     | 1                 | -                | -                | R2               | 2         | -                          |
| NFE2    | 1                 | -                | -                | R2               | 2         | likely OA                  |
| RICTOR  | -                 | -                | -                | -                | -         | OA                         |
| SRC     | -                 | -                | -                | -                | -         | likely OA                  |
| TP53    | -                 | -                | Px1              | -                | -         | -                          |
| WT1     | -                 | -                | Px2              | -                | -         | -                          |
| ERBB3   | -                 | -                | -                | -                | -         | OA                         |
| BCL2L11 | -                 | -                | -                | -                | -         | OA                         |
| SMARCA4 | -                 | -                | -                | -                | -         | OA                         |
| MED12   | -                 | -                | -                | -                | -         | OA                         |
| TSC2    | 1                 | -                | -                | -                | 2         | -                          |
| NF1     | 1                 | Dx2              | -                | -                | 2         | -                          |
| KEAP1   | -                 | -                | -                | -                | -         | OA                         |
| PTEN    | 4                 | Dx3              | -                | -                | 3         | -                          |
| NF2     | -                 | -                | -                | -                | -         | likely OA                  |
| CIC     | -                 | -                | -                | -                | -         | likely OA                  |
| CDKN2B  | -                 | -                | -                | -                | -         | OA                         |
| EP300   | -                 | Dx3              | -                | -                | -         | -                          |
| GATA6   | -                 | -                | -                | -                | -         | likely OA                  |
| BCL6    | -                 | Dx2              | -                | -                | -         | -                          |

Table 3: SUPPLEMENTARY. Clinical relevance of the recommended genes according to OncoKB [51]. Only genes that can be assigned to OncoKB categories are shown. Specific definitions can be found in OncoKB (<https://www.oncokb.org/levels>).

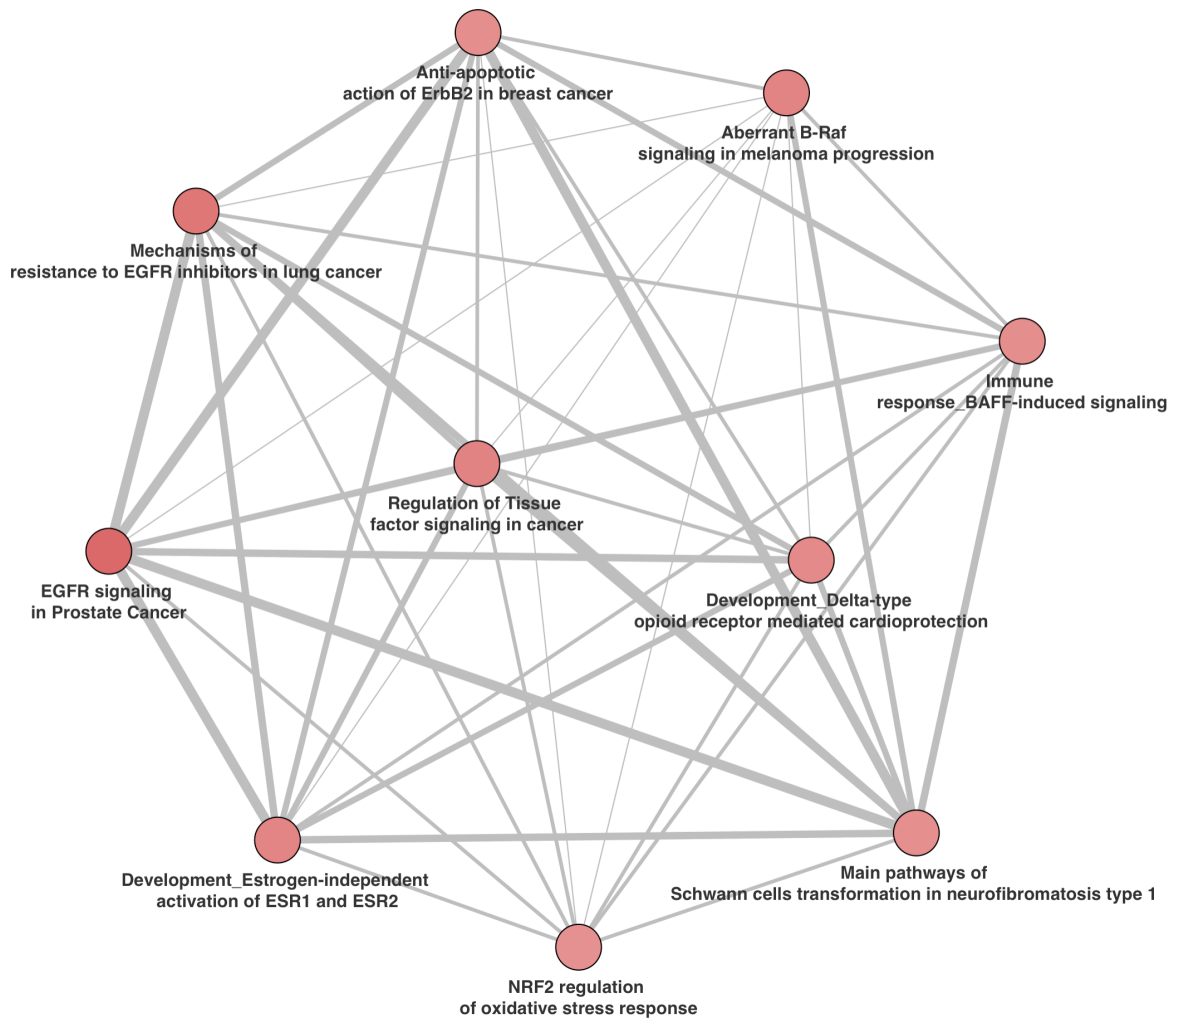

Figure 8: SUPPLEMENTARY. Crosstalk analysis of recommended hits. The network of the top 10 ontology terms from pathway enrichment analysis. Nodes represent top terms and edges represent significant similarities (as measured by hypergeometric test) between these entities. The edge thickness depends on the size of intersection between two ontology terms while the color of the node corresponds to the enrichment z-score.

**A**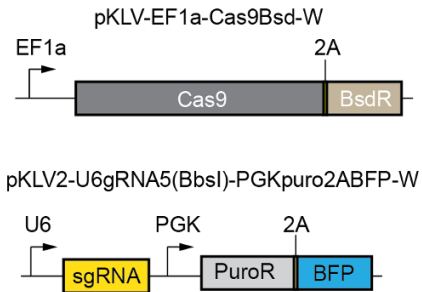**B**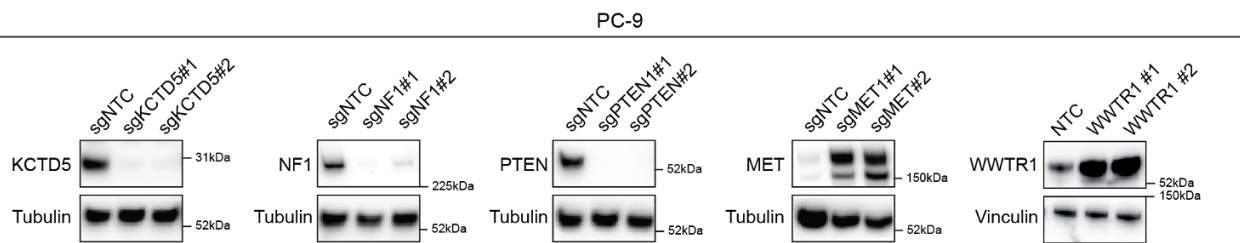**C**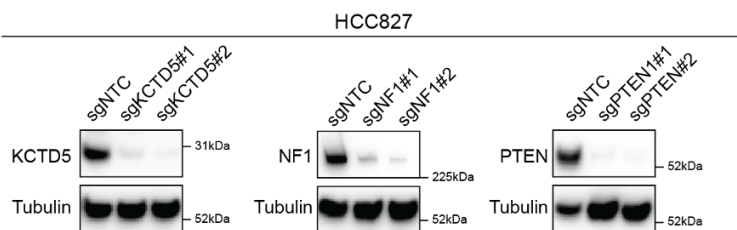**D**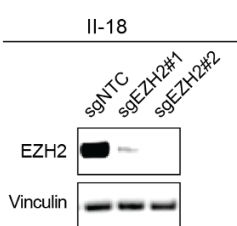

Figure 9: SUPPLEMENTARY. Evaluation of gene KO and activation in NSCLC cell lines. A CRISPR Cas9 vector system used for generation of PC-9 and HCC827 KO cell lines. In these cell lines Cas9 is expressed constitutively after Blasticidin selection. pKLV2 sgRNA vector co-expressed BFP for FACS based tracking of proliferation. B Loss of target gene expression of KCTD5, NF1 and PTEN as well as overexpression of MET and WWTR1 in PC-9. Whole cell lysates were analysed 14 days after transduction. C Loss of target gene expression of KCTD5, NF1 and PTEN in HCC827. Whole cell lysates were analysed 14 days after transduction. D) Loss of target gene expression of EZH2 in II-18. Whole cell lysates were analysed 14 days after transduction. For each gene KO or activation was confirmed with two independent guide RNAs which are considered biological replicates (n=2).

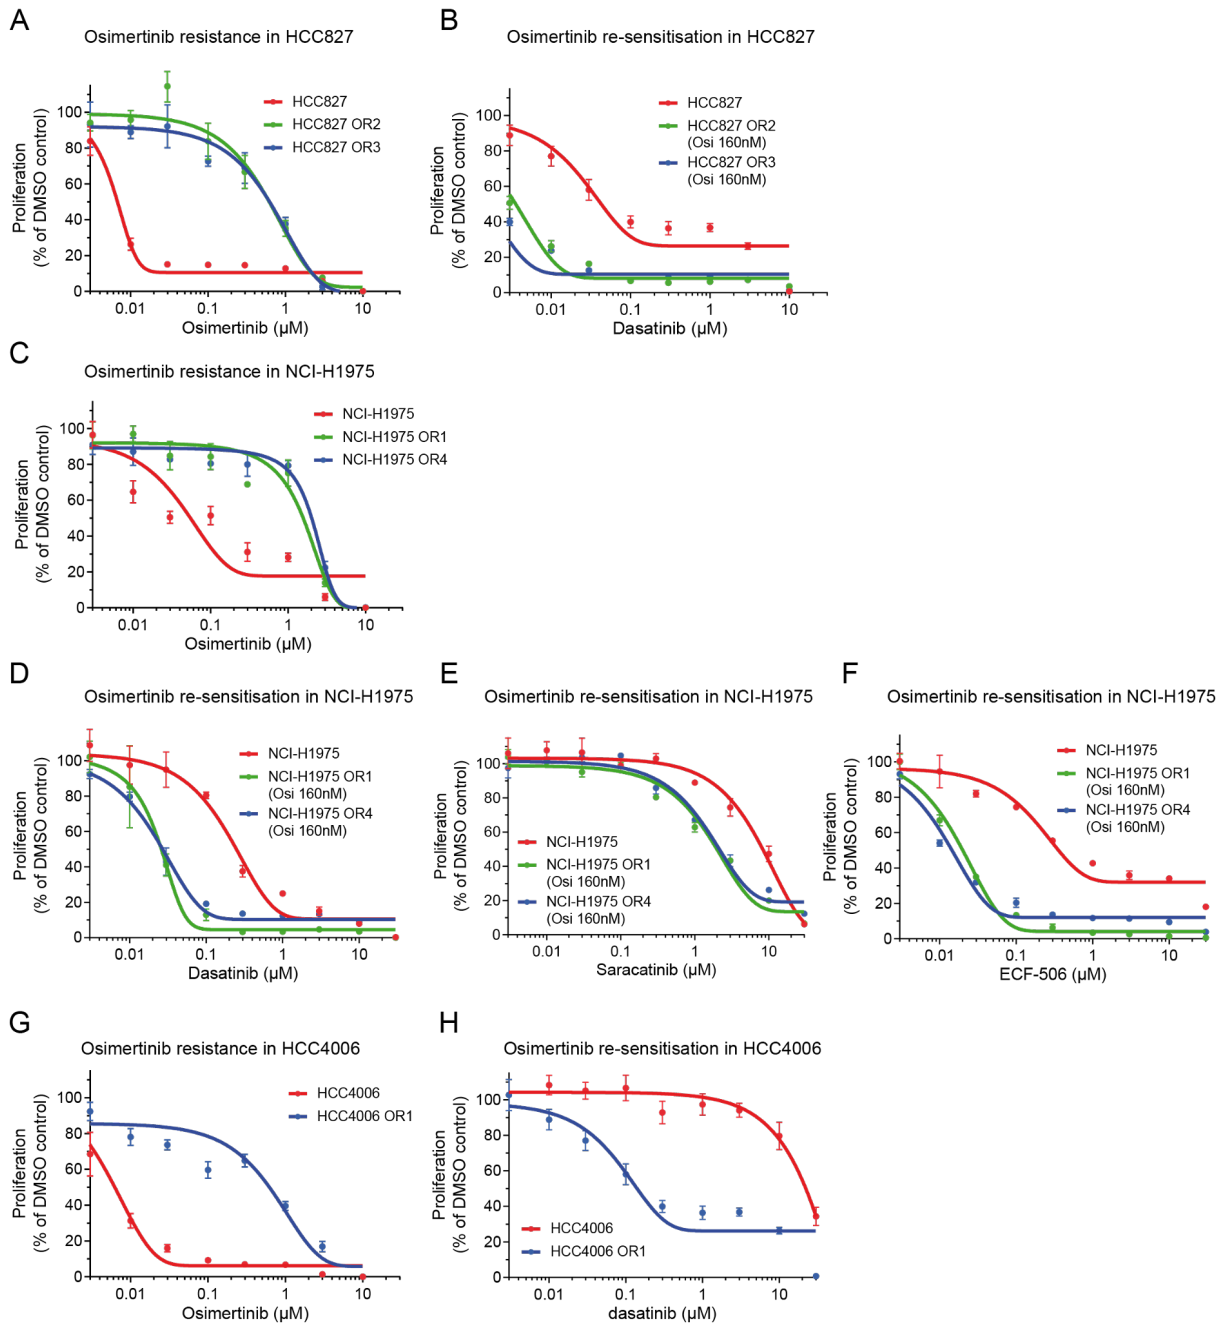

Figure 10: SUPPLEMENTARY. Dose response curves for small molecule SRC inhibitors indicate importance of SRC in mediating osimertinib resistance. A) Osimertinib dose response curve in HCC827 parental cells compared to two lines derived to have acquired osimertinib resistance, as measured by Cell Titer Glo (96h treatment). B) Dasatinib dose response curve in HCC827 parental vs. resistant lines, as measured by Cell Titer Glo (96h treatment). Resistant cells were co-treated with 160 nM osimertinib. C) Osimertinib dose response curve in NCI-H1975 parental cells compared to two lines derived to have acquired osimertinib resistance, as measured by Cell Titer Glo (96h treatment). Dose response curves for NCI-H1975 vs. resistant lines for D) dasatinib E) saracatinib and F) ECF-506, as measured by Cell Titer Glo (96h treatment). G) Osimertinib dose response curve in HCC4006 parental cells compared to two lines derived to have acquired osimertinib resistance, as measured by Cell Titer Glo (96h treatment). H) Dasatinib dose response curve in HCC4006 parental vs. resistant lines, as measured by Cell Titer Glo (96h treatment). Resistant cells were co-treated with 160 nM osimertinib. OR = osimertinib (Osi) resistant. Data are presented as mean values  $\pm$  SD ( $n = 3$ ) of a typical plot, where the experiment was repeated at least 3 times.

| Method            | Target gene | sgRNA                     | Target sequence            |
|-------------------|-------------|---------------------------|----------------------------|
| CRISPR KO         | NTC         | sgNTC                     | 5'-ACGCTAAACCAACGGTGC-3'   |
|                   | KCTD5       | sgKCTD5 #1                | 5'-ACGTTGAGTCGGACCCACT-3'  |
|                   |             | sgKCTD5 #2                | 5'-GATTTCGGGTCCCGGCACA-3'  |
|                   | NF1         | sgNF1 #1                  | 5'-CCGAAGTTCAGCTGCATGC-3'  |
|                   |             | sgNF1 #2                  | 5'-TTAGCAGTTATAAATAGCC-3'  |
| PTEN              | sgPTEN #1   | 5'-CCGCCAAATTTAATTGCAG-3' |                            |
|                   | sgPTEN #2   | 5'-GATAAGTTCTAGCTGTGGT-3' |                            |
| CRISPR activation | EZH2        | sgEZH2 #1                 | 5'-ACTAAGTCTTACCAAATGC-3'  |
|                   |             | sgEZH2 #2                 | 5'-AACACCCAACACTTATAAG-3'  |
| CRISPR activation | MET         | sgMET #1                  | 5'-TGGCAGGGCAGCGCGGTGT-3'  |
|                   |             | sgMET #2                  | 5'-TGGTCGCCTGGCGGTGCCTC-3' |
| CRISPR activation | WWTR1       | sgWWTR1 #1                | 5'-GTAAAGTACCCATCACGCC-3'  |
|                   |             | sgWWTR1 #2                | 5'-ACTCAAAGGAATGCAGATGC-3' |

Table 4: SUPPLEMENTARY. Target sequences of guide RNAs used in this study



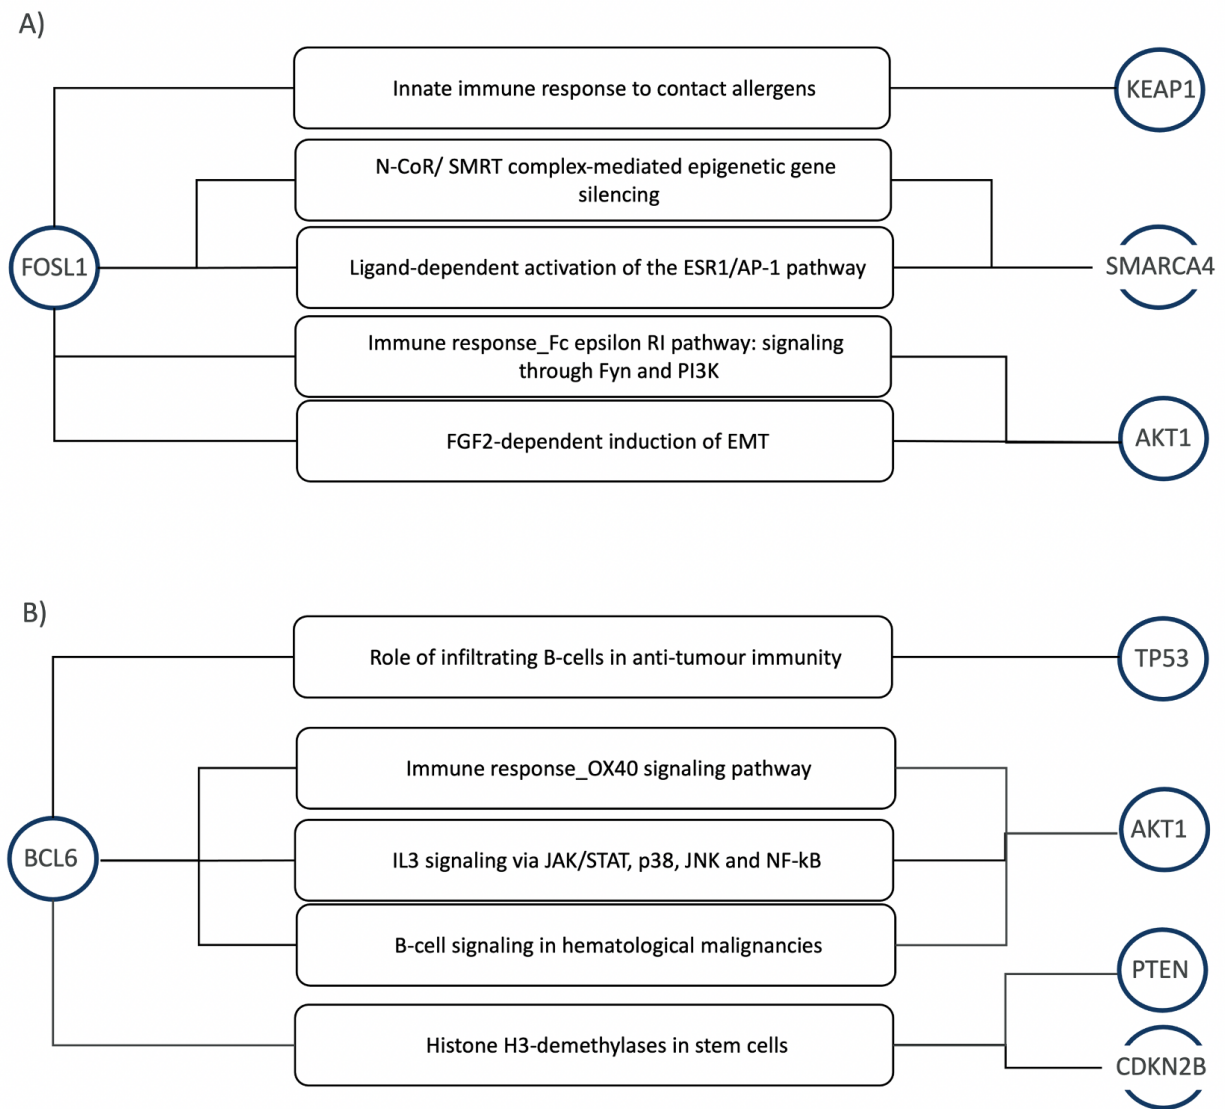

Figure 11: SUPPLEMENTARY. Markers predicted by recommendation system showing evidence paths to osimertinib resistance markers. A) FOSL1's role in epigenetic silencing and innate immune response. B) BCL6's role in anti-tumour immunity, cross-talk with key aberrant pathways in cancer such as JAK/STAT and p38.

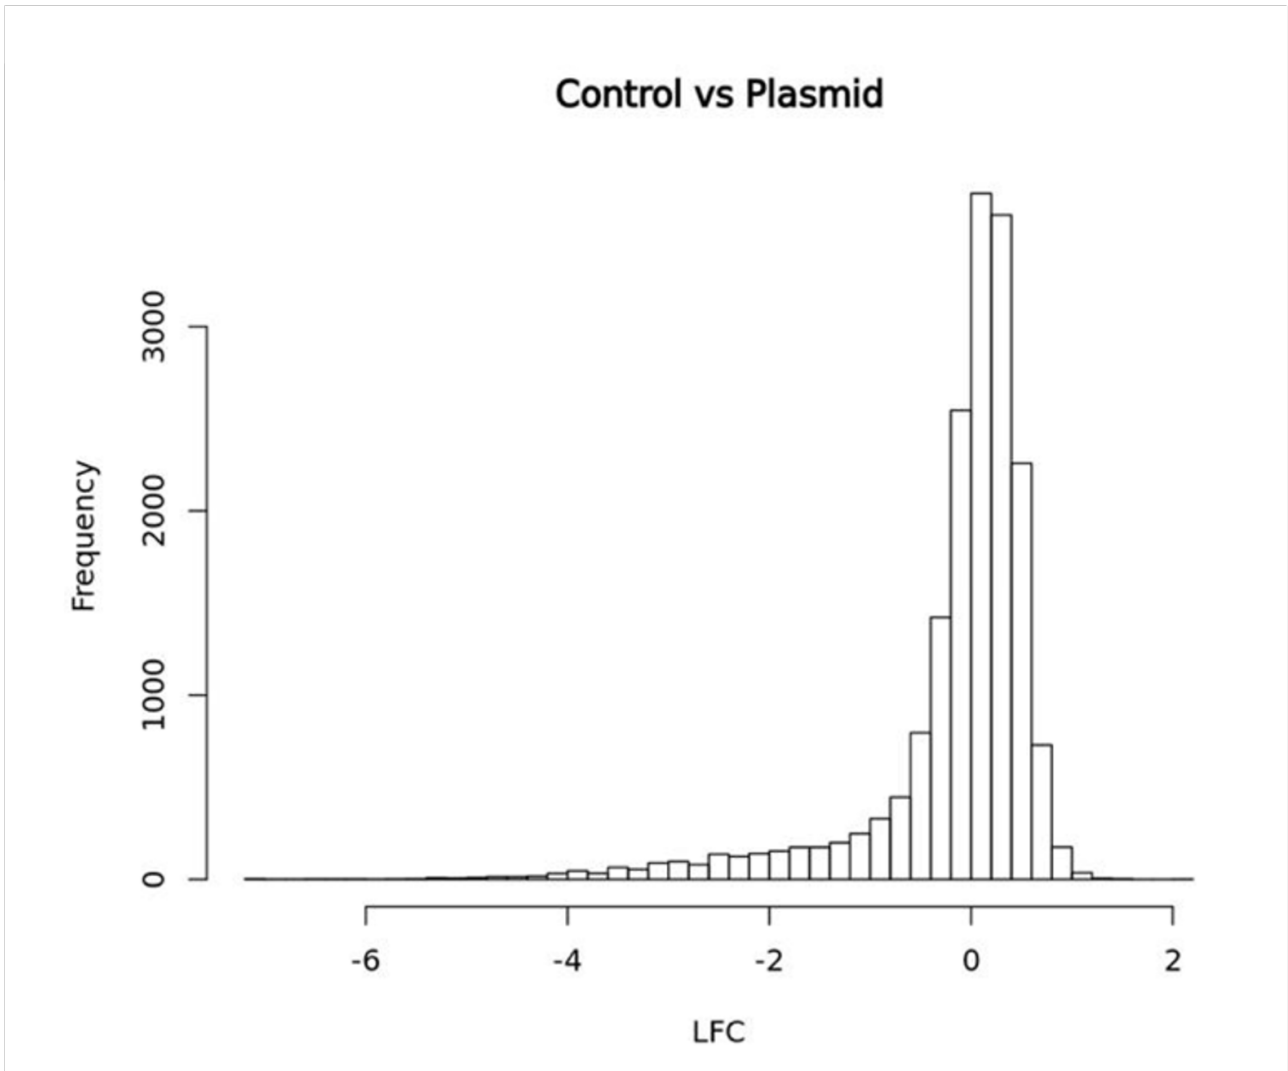

Figure 12: SUPPLEMENTARY. Log Fold Change distribution is expected to be centered around 0 confirming that there are no survival issues with the cell population.

A WB full scans of supplementary figure 9 B/C

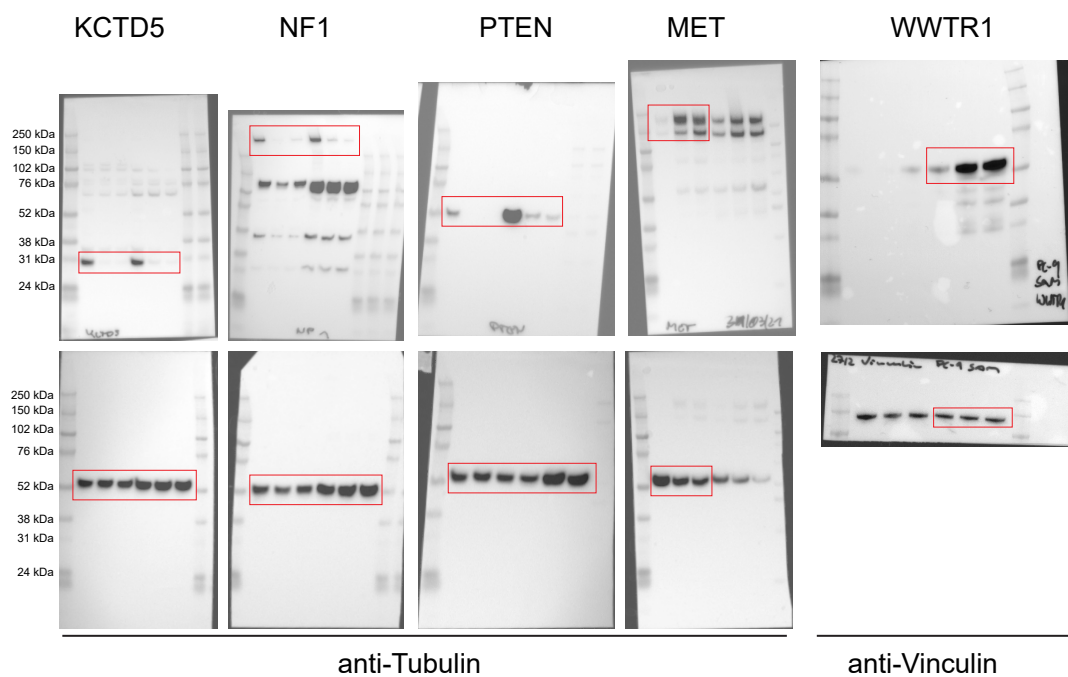

B WB full scans of supplementary figure 9 D

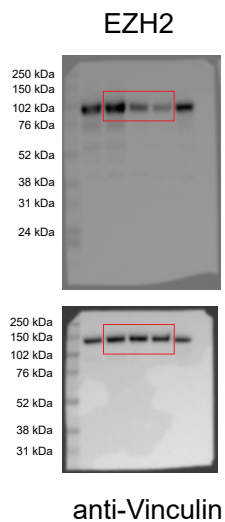

Supplement: 41467_2022_29292_MOESM1_ESM.pdf [file 41467_2022_29292_MOESM1_ESM.pdf]
